# Supplementary material
Source: PubMed Central journal article supplement (PMC5485719)

**Supplementary Table 1.** MetGen cohorts.

| <b>Cohort</b> | <b>Ethnicity</b>  | <b>Country</b>         | <b>Reference</b>                                                                                        | <b>Study Design</b>                                       |
|---------------|-------------------|------------------------|---------------------------------------------------------------------------------------------------------|-----------------------------------------------------------|
| DCS           | European          | Netherlands            | van Leeuwen et al., 2012 <sup>1</sup>                                                                   | Population, observational, EMR-linked                     |
| GoDARTS       | European          | Scotland, UK           | Zhou et al., 2011 <sup>2</sup>                                                                          | Population, observational, EMR-linked                     |
| HOME          | European          | Netherlands            | Kooy et al., 2009 <sup>3</sup>                                                                          | RCT, metformin added to insulin                           |
| Košice        | European          | Slovakia               | Tkáč et al., 2013 <sup>4</sup>                                                                          | Population, observational, retrospective                  |
| PMT1-EU       | European American | USA                    | Choi et al., 2011 <sup>5</sup> ; Stocker et al., 2013 <sup>6</sup> ; Goswami et al., 2014 <sup>7</sup>  | Population, observational, EMR-linked                     |
| PMT2-EU*      | European American | USA                    | Hoffmann et al., 2011 <sup>8</sup> ; Banda et al., 2015 <sup>9</sup> ; Kvale et al., 2015 <sup>10</sup> | Population, observational, EMR-linked                     |
| Riga          | European          | Latvia                 | Tarasova et al., 2012 <sup>11</sup>                                                                     | Population, observational, retrospective                  |
| Rotterdam     | European          | Netherlands            | Becker et al., 2009 <sup>12</sup>                                                                       | Population, observational, EMR-linked                     |
| Sarajevo      | European          | Bosnia and Herzegovina | Dujic et al., 2016 <sup>13</sup>                                                                        | Population, observational, prospective                    |
| SDDS          | European          | Denmark                | Christensen et al., 2011 <sup>14</sup>                                                                  | RCT, metformin added to insulin and rosiglitazone/placebo |

DCS, The Hoorn Diabetes Care System cohort study. GoDARTS, Genetics of Diabetes Audit and Research Tayside Study. HOME, Hyperinsulinemia: the Outcome of its Metabolic Effects trial. PMT, Pharmacogenomics of Membrane Transporters studies. SDDS, South Danish Diabetes Study. EMR, electronic medical record. RCT, randomized controlled trial. \*Participants from the PMT2-EU cohort were selected from the Genetic Epidemiology Research on Adult Health and Aging (GERA) cohort, a subsample of the Kaiser Permanente Research Program on Genes, Environment, and Health (RPGEH).

**Supplementary Table 2.** Genotyping platforms and minor allele frequencies of analysed SNPs in the individual studies.

|                          |              | <b>DCS</b>        | <b>GoDARTS</b>    | <b>HOME</b> | <b>Košice</b> | <b>PMT1-EU</b>    | <b>PMT2-EU</b> | <b>Riga</b> | <b>Rotterdam</b> | <b>Sarajevo</b> | <b>SDDS</b>            |
|--------------------------|--------------|-------------------|-------------------|-------------|---------------|-------------------|----------------|-------------|------------------|-----------------|------------------------|
| Genotyping Platform      |              | Array +<br>TaqMan | Array +<br>TaqMan |             | TaqMan        | Array +<br>TaqMan | Array          | Array       | Array            | TaqMan          | TaqMan +<br>Sequencing |
| Number of available SNPs |              | 9                 | 9                 | 3           | 5             | 9                 | 8*             | 3           | 8*               | 7               | 6                      |
| Minor allele frequencies | Minor allele |                   |                   |             |               |                   |                |             |                  |                 |                        |
| OCT1 R61C                | T            | 0.08              | 0.06              | 0.08        | -             | 0.06              | 0.08           | 0.07        | 0.07             | 0.11            | 0.07                   |
| OCT1 M420del             | del          | 0.18              | 0.19              | -           | -             | 0.15              | 0.18           | -           | -                | 0.16            | 0.18                   |
| OCT1 rs622342            | C            | 0.36              | 0.39              | 0.40        | 0.25          | 0.33              | 0.37           | -           | 0.33             | -               | 0.39                   |
| OCT2 A270S               | T            | 0.13              | 0.11              | -           | 0.06          | 0.12              | 0.10           | 0.08        | 0.11             | 0.04            | 0.10                   |
| MATE1 rs2289669          | A            | 0.43              | 0.38              | 0.37        | 0.45          | 0.34              | 0.39           | 0.37        | 0.36             | 0.39            | 0.43                   |
| MATE1 rs2252281          | C            | 0.38              | 0.37              | -           | -             | 0.41              | -              | -           | 0.37             | 0.40            | 0.41                   |
| MATE2-K rs12943590       | A            | 0.27              | 0.27              | -           | 0.33          | 0.27              | 0.30           | -           | 0.26             | 0.39            | -                      |
| OCTN1 T306I              | T            | 0.33              | 0.36              | -           | 0.44          | 0.36              | 0.39           | -           | 0.32             | 0.41            | -                      |
| OCTN1 L503F              | T            | 0.44              | 0.44              | -           | -             | 0.30              | 0.43           | -           | 0.37             | -               | -                      |

\* SNPs were imputed using SNPTEST (PMT2-EU) or MACH software (Rotterdam) and the 1,000 Genomes reference panel.

**Supplementary Table 3.** Clinical factors added as covariates in individual studies.

| <b>Covariate</b>                | <b>DCS</b> | <b>GoDARTS</b> | <b>Košice</b> | <b>PMT1-EU</b> | <b>PMT2-EU</b> | <b>Riga</b> | <b>Rotterdam</b> | <b>Sarajevo</b> |
|---------------------------------|------------|----------------|---------------|----------------|----------------|-------------|------------------|-----------------|
| Pre-treatment HbA <sub>1c</sub> | Y          | Y              | Y             | Y              | Y              | Y           | Y                | Y               |
| Daily dose                      | Y          | Y              | Y             | Y              | Y              | Y           | Y                | Y               |
| Adherence                       | N          | Y              | N             | N              | Y              | N           | Y                | N               |
| Creatinine clearance            | Y          | Y              | Y             | Y              | Y              | Y           | Y                | Y               |
| Baseline gap <sup>a</sup>       | NA         | Y              | NA            | Y              | Y              | Y           | Y                | NA              |
| Treatment group <sup>b</sup>    | Y          | Y              | NA            | NA             | Y              | NA          | Y                | NA              |

Y, yes. N, not available. NA, not applicable. <sup>a</sup> Time between pre-treatment HbA<sub>1c</sub> measurement and start of metformin therapy. <sup>b</sup> Metformin prescribed as monotherapy or dual therapy (metformin added to stable sulfonylurea treatment).

**Supplementary Table 4.** Meta-analysis results for the effects of candidate variants in transporters genes on metformin glycaemic response in the total group of patients (monotherapy and dual therapy).

| SNP              | Effect allele | n | N    | Beta   | SE    | p     | I <sup>2</sup> | p(Q)  |
|------------------|---------------|---|------|--------|-------|-------|----------------|-------|
| OCT1 R61C        | T             | 7 | 6065 | 0.009  | 0.028 | 0.740 | 0.0            | 0.939 |
| OCT1 M420del     | del           | 5 | 5973 | 0.013  | 0.020 | 0.506 | 0.0            | 0.980 |
| OCT1 RF alleles* |               | 5 | 5559 | 0.015  | 0.018 | 0.402 | 0.0            | 0.950 |
| OCT1 rs622342    | C             | 6 | 7081 | 0.008  | 0.014 | 0.573 | 0.0            | 0.502 |
| OCT2 A270S       | T             | 8 | 6813 | 0.026  | 0.022 | 0.241 | 27.0           | 0.213 |
| MATE1 rs2289669  | A             | 8 | 6736 | 0.0004 | 0.013 | 0.976 | 4.6            | 0.395 |
| MATE1 rs2252281  | C             | 5 | 3346 | 0.016  | 0.020 | 0.426 | 0.0            | 0.499 |
| MATE2 rs12943590 | A             | 7 | 5530 | -0.009 | 0.017 | 0.605 | 0.0            | 0.569 |
| OCTN1 T306I      | T             | 7 | 6362 | -0.001 | 0.014 | 0.971 | 0.0            | 0.512 |
| OCTN1 L503F      | T             | 5 | 5818 | -0.003 | 0.015 | 0.843 | 0.0            | 0.645 |

n, number of studies included in the meta-analysis; N, overall number of patients; I<sup>2</sup>, heterogeneity index; p(Q), p-value for Cochrane's Q statistic. \* Combined genotype for R61C and M420del - number of reduced-function (RF) alleles. A positive beta is a greater glycaemic response to metformin associated with the effect allele.

**Supplementary Table 5.** Association of individual SNPs with metformin glycaemic response in the HOME and SDDS studies.

| SNP              | Effect allele | HOME |        |       |          | SDDS |        |       |          |
|------------------|---------------|------|--------|-------|----------|------|--------|-------|----------|
|                  |               | N    | Beta   | SE    | <i>p</i> | N    | Beta   | SE    | <i>p</i> |
| OCT1 R61C        | T             | 163  | 0.063  | 0.201 | 0.753    | 149  | -0.010 | 0.186 | 0.960    |
| OCT1 M420del     | del           | -    | -      | -     | -        | 148  | 0.060  | 0.133 | 0.650    |
| OCT1 RF alleles* |               | -    | -      | -     | -        | 148  | 0.040  | 0.120 | 0.720    |
| OCT1 rs622342    | C             | 163  | -0.019 | 0.113 | 0.863    | 148  | -0.180 | 0.102 | 0.072    |
| OCT2 A270S       | T             | -    | -      | -     | -        | 149  | -0.320 | 0.161 | 0.050    |
| MATE1 rs2289669  | A             | 163  | 0.099  | 0.118 | 0.402    | 149  | -0.030 | 0.094 | 0.760    |
| MATE1 rs2252281  | C             | -    | -      | -     | -        | 146  | 0.070  | 0.092 | 0.440    |

N, number of patients. \* Combined genotype for R61C and M420del - number of reduced-function (RF) alleles. A positive beta is a greater glycaemic response to metformin associated with the effect allele.

**Supplementary Table 6a.** Meta-analysis results of SNP x dose interaction effects in all participants treated with metformin (monotherapy and dual therapy).

| SNP              | Effect allele | n | N    | Continuous dose |       |       |                |       | Dichotomous dose |       |       |                |       |
|------------------|---------------|---|------|-----------------|-------|-------|----------------|-------|------------------|-------|-------|----------------|-------|
|                  |               |   |      | Beta            | SE    | p     | I <sup>2</sup> | p(Q)  | Beta             | SE    | p     | I <sup>2</sup> | p(Q)  |
| OCT1 R61C        | T             | 5 | 5884 | -0.004          | 0.017 | 0.797 | 0.0            | 0.929 | -0.032           | 0.065 | 0.623 | 0.0            | 0.681 |
| OCT1 M420del     | del           | 4 | 5847 | 0.009           | 0.012 | 0.430 | 0.0            | 0.855 | 0.066            | 0.042 | 0.115 | 15.1           | 0.317 |
| OCT1 RF alleles* |               | 4 | 5433 | 0.003           | 0.010 | 0.794 | 0.0            | 0.951 | 0.043            | 0.040 | 0.287 | 0.0            | 0.848 |
| OCT1 rs622342    | C             | 5 | 6915 | 0.023           | 0.009 | 0.009 | 42.6           | 0.138 | 0.091            | 0.032 | 0.004 | 0.0            | 0.496 |
| OCT2 A270S       | T             | 6 | 6586 | 0.010           | 0.015 | 0.481 | 38.0           | 0.153 | 0.017            | 0.048 | 0.734 | 15.9           | 0.312 |
| MATE1 rs2289669  | A             | 6 | 6506 | 0.011           | 0.008 | 0.136 | 0.0            | 0.550 | 0.056            | 0.031 | 0.073 | 0.0            | 0.417 |
| MATE1 rs2252281  | C             | 4 | 3223 | 0.004           | 0.012 | 0.723 | 0.0            | 0.884 | 0.037            | 0.039 | 0.344 | 0.0            | 0.860 |
| MATE2 rs12943590 | A             | 6 | 5405 | -0.006          | 0.010 | 0.579 | 0.0            | 0.648 | 0.011            | 0.039 | 0.768 | 0.0            | 0.842 |
| OCTN1 T306I      | T             | 6 | 6171 | 0.001           | 0.009 | 0.927 | 12.1           | 0.338 | 0.008            | 0.032 | 0.801 | 0.0            | 0.875 |
| OCTN1 L503F      | T             | 4 | 5655 | 0.013           | 0.008 | 0.114 | 40.3           | 0.170 | 0.066            | 0.053 | 0.218 | 54.2           | 0.088 |

n, number of studies included in the meta-analysis; N, overall number of patients; I<sup>2</sup>, heterogeneity index; p(Q), p-value for Cochrane's Q statistic.

\*Combined genotype for R61C and M420del - number of reduced-function (RF) alleles. A positive beta is a greater glycaemic response to metformin associated with the effect allele.

**Supplementary Table 6b.** Meta-analysis results for the effects of candidate variants in transporters genes on metformin glycaemic response in all participants treated with metformin (monotherapy and dual therapy) - stratified by metformin dose.

| SNP              | Effect allele | n | Dose <=1000 mg |        |       |       |                |       | Dose > 1000 mg |        |       |       |                |       |
|------------------|---------------|---|----------------|--------|-------|-------|----------------|-------|----------------|--------|-------|-------|----------------|-------|
|                  |               |   | N              | Beta   | SE    | p     | I <sup>2</sup> | p(Q)  | N              | Beta   | SE    | p     | I <sup>2</sup> | p(Q)  |
| OCT1 R61C        | T             | 5 | 3898           | 0.017  | 0.034 | 0.616 | 0.0            | 0.931 | 1986           | -0.019 | 0.054 | 0.728 | 0.0            | 0.757 |
| OCT1 M420del     | del           | 4 | 3818           | -0.001 | 0.024 | 0.967 | 44.0           | 0.148 | 2029           | 0.046  | 0.034 | 0.175 | 0.0            | 0.660 |
| OCT1 RF alleles* |               | 4 | 3525           | 0.004  | 0.022 | 0.860 | 0.0            | 0.452 | 1908           | 0.040  | 0.032 | 0.210 | 0.0            | 0.999 |
| OCT1 rs622342    | C             | 5 | 4561           | -0.013 | 0.017 | 0.436 | 25.1           | 0.254 | 2354           | 0.045  | 0.026 | 0.085 | 0.0            | 0.826 |
| OCT2 A270S       | T             | 6 | 4354           | 0.015  | 0.026 | 0.575 | 0.0            | 0.524 | 2232           | 0.076  | 0.075 | 0.312 | 53.3           | 0.057 |
| MATE1 rs2289669  | A             | 6 | 4374           | -0.003 | 0.016 | 0.854 | 25.4           | 0.243 | 2132           | 0.037  | 0.026 | 0.160 | 35.8           | 0.169 |
| MATE1 rs2252281  | C             | 4 | 2026           | 0.019  | 0.024 | 0.440 | 0.0            | 0.712 | 1197           | 0.028  | 0.036 | 0.441 | 0.0            | 0.601 |
| MATE2 rs12943590 | A             | 6 | 3719           | -0.009 | 0.020 | 0.643 | 0.0            | 0.793 | 1686           | -0.023 | 0.029 | 0.437 | 0.0            | 0.843 |
| OCTN1 T306I      | T             | 6 | 4010           | 0.001  | 0.018 | 0.974 | 0.0            | 0.589 | 2161           | 0.015  | 0.027 | 0.592 | 0.0            | 0.683 |
| OCTN1 L503F      | T             | 4 | 3753           | -0.018 | 0.018 | 0.307 | 0.0            | 0.463 | 1902           | 0.026  | 0.027 | 0.336 | 23.6           | 0.270 |

n, number of studies included in the meta-analysis; N, overall number of patients; I<sup>2</sup>, heterogeneity index; p(Q), p-value for Cochrane's Q statistic.

\*Combined genotype for R61C and M420del - number of reduced-function (RF) alleles. A positive beta is a greater glycaemic response to metformin associated with the effect allele.

**Supplementary Table 7a.** Meta-analysis results for the effects of individual SNPs in the subgroups of patients homozygous for the wild-type (wt/wt) or variant allele (v/v) of possible confounding SNPs - interactions between metformin liver transporters - all patients (monotherapy and dual therapy).

| Subgroup              | SNP             | Effect allele | n | N    | Beta   | SE    | p     | I <sup>2</sup> | p(Q)  |
|-----------------------|-----------------|---------------|---|------|--------|-------|-------|----------------|-------|
| 0 OCT1 RF alleles*    | MATE1 rs2289669 | A             | 5 | 2332 | 0.0002 | 0.026 | 0.994 | 0.0            | 0.734 |
|                       | MATE1 rs2252281 | C             | 4 | 1199 | 0.034  | 0.038 | 0.367 | 0.0            | 0.972 |
| 2 OCT1 RF alleles     | MATE1 rs2289669 | A             | 5 | 246  | -0.112 | 0.108 | 0.300 | 83.4           | 0.000 |
|                       | MATE1 rs2252281 | C             | 4 | 139  | 0.176  | 0.129 | 0.173 | 67.5           | 0.026 |
| OCT1 rs622342 wt/wt   | MATE1 rs2289669 | A             | 6 | 2450 | 0.006  | 0.023 | 0.812 | 14.3           | 0.323 |
|                       | MATE1 rs2252281 | C             | 4 | 1256 | 0.039  | 0.032 | 0.226 | 0.0            | 0.762 |
| OCT1 rs622342 v/v     | MATE1 rs2289669 | A             | 6 | 832  | 0.064  | 0.063 | 0.305 | 67.9           | 0.008 |
|                       | MATE1 rs2252281 | C             | 4 | 431  | 0.046  | 0.049 | 0.351 | 32.3           | 0.219 |
| MATE1 rs2289669 wt/wt | OCT1 RF alleles |               | 5 | 1600 | 0.039  | 0.032 | 0.220 | 14.4           | 0.322 |
|                       | OCT1 rs622342   | C             | 6 | 2126 | 0.002  | 0.040 | 0.961 | 47.7           | 0.089 |
| MATE1 rs2289669 v/v   | OCT1 RF alleles |               | 5 | 387  | 0.035  | 0.067 | 0.596 | 0.0            | 0.733 |
|                       | OCT1 rs622342   | C             | 6 | 661  | -0.024 | 0.045 | 0.594 | 0.0            | 0.859 |
| MATE1 rs2252281 wt/wt | OCT1 RF alleles |               | 4 | 829  | 0.030  | 0.044 | 0.506 | 0.0            | 0.900 |
|                       | OCT1 rs622342   | C             | 4 | 1228 | 0.018  | 0.031 | 0.570 | 0.0            | 0.856 |
| MATE1 rs2252281 v/v   | OCT1 combined   |               | 4 | 333  | -0.091 | 0.080 | 0.257 | 49.6           | 0.114 |
|                       | OCT1 RF alleles | C             | 4 | 466  | -0.006 | 0.049 | 0.897 | 0.0            | 0.486 |

n, number of studies included in the meta-analysis; N, overall number of patients; I<sup>2</sup>, heterogeneity index; p(Q), p-value for Cochrane's Q statistic.

\*Combined genotype for R61C and M420del - number of reduced-function (RF) alleles. A positive beta is a greater glycaemic response to metformin associated with the effect allele.



**Supplementary Table 7b.** Meta-analysis results for the effects of individual SNPs in the subgroups of patients homozygous for the wild-type (wt/wt) or variant allele (v/v) of possible confounding SNPs - interactions between metformin kidney transporters - all patients (monotherapy and dual therapy).

| Subgroup              | SNP              | Effect allele | n | N    | Beta   | SE    | p     | I <sup>2</sup> | p(Q)  |
|-----------------------|------------------|---------------|---|------|--------|-------|-------|----------------|-------|
| OCT2 A270S wt/wt      | MATE1 rs2289669  | A             | 7 | 5070 | 0.008  | 0.016 | 0.644 | 36.5           | 0.150 |
|                       | MATE1 rs2252281  | C             | 5 | 2337 | 0.002  | 0.024 | 0.924 | 0.0            | 0.830 |
|                       | MATE2 rs12943590 | A             | 7 | 4016 | -0.005 | 0.020 | 0.812 | 0.0            | 0.525 |
|                       | OCTN1 T306I      | T             | 7 | 4813 | 0.011  | 0.017 | 0.537 | 0.0            | 0.527 |
|                       | OCTN1 L503F      | T             | 5 | 4601 | -0.006 | 0.016 | 0.700 | 7.9            | 0.362 |
| OCT2 A270S v/v        | MATE1 rs2289669  | A             | 3 | 77   | -0.073 | 0.146 | 0.619 | 0.0            | 0.876 |
|                       | MATE1 rs2252281  | C             | 2 | 45   | 0.361  | 0.158 | 0.022 | 0.0            | 0.923 |
|                       | MATE2 rs12943590 | A             | 3 | 60   | 0.056  | 0.239 | 0.816 | 0.0            | 0.484 |
|                       | OCTN1 T306I      | T             | 3 | 66   | 0.069  | 0.182 | 0.706 | 40.8           | 0.185 |
|                       | OCTN1 L503F      | T             | 3 | 64   | 0.119  | 0.166 | 0.475 | 38.1           | 0.199 |
| MATE1 rs2289669 wt/wt | OCT2 A270S       | T             | 7 | 2117 | 0.025  | 0.037 | 0.489 | 8.2            | 0.366 |
|                       | MATE2 rs12943590 | A             | 7 | 1617 | -0.053 | 0.056 | 0.350 | 49.0           | 0.068 |
|                       | OCTN1 T306I      | T             | 7 | 1891 | 0.049  | 0.050 | 0.324 | 62.9           | 0.013 |
|                       | OCTN1 L503F      | T             | 5 | 1804 | -0.044 | 0.026 | 0.085 | 0.0            | 0.874 |
| MATE1 rs2289669 v/v   | OCT2 A270S       | T             | 6 | 629  | -0.018 | 0.127 | 0.888 | 62.8           | 0.020 |
|                       | MATE2 rs12943590 | A             | 7 | 419  | 0.073  | 0.049 | 0.139 | 9.0            | 0.360 |
|                       | OCTN1 T306I      | T             | 7 | 524  | 0.082  | 0.048 | 0.087 | 6.5            | 0.378 |
|                       | OCTN1 L503F      | T             | 5 | 477  | -0.107 | 0.047 | 0.024 | 0.0            | 0.891 |
| MATE1 rs2252281 wt/wt | OCT2 A270S       | T             | 5 | 1111 | 0.032  | 0.050 | 0.514 | 0.0            | 0.883 |
|                       | MATE2 rs12943590 | A             | 5 | 869  | -0.010 | 0.043 | 0.814 | 0.0            | 0.520 |
|                       | OCTN1 T306I      | T             | 5 | 960  | -0.021 | 0.038 | 0.581 | 47.2           | 0.108 |
|                       | OCTN1 L503F      | T             | 4 | 880  | -0.004 | 0.040 | 0.928 | 27.4           | 0.247 |
| MATE1 rs2252281 v/v   | OCT2 A270S       | T             | 4 | 414  | 0.123  | 0.069 | 0.074 | 0.0            | 0.528 |
|                       | MATE2 rs12943590 | A             | 5 | 325  | -0.031 | 0.057 | 0.581 | 0.0            | 0.757 |
|                       | OCTN1 T306I      | T             | 5 | 369  | -0.022 | 0.057 | 0.695 | 37.2           | 0.173 |

|                        |                  |   |   |      |        |       |       |      |       |
|------------------------|------------------|---|---|------|--------|-------|-------|------|-------|
|                        | OCTN1 L503F      | T | 4 | 340  | -0.009 | 0.064 | 0.885 | 0.0  | 0.824 |
| MATE2 rs12943590 wt/wt | OCT2 A270S       | T | 7 | 2487 | 0.007  | 0.034 | 0.834 | 41.9 | 0.112 |
|                        | MATE1 rs2289669  | A | 7 | 2479 | 0.003  | 0.020 | 0.903 | 0.0  | 0.508 |
|                        | MATE1 rs2252281  | C | 5 | 1210 | 0.058  | 0.033 | 0.075 | 0.0  | 0.591 |
|                        | OCTN1 T306I      | T | 7 | 2344 | 0.039  | 0.023 | 0.093 | 40.8 | 0.119 |
|                        | OCTN1 L503F      | T | 5 | 2127 | -0.024 | 0.023 | 0.301 | 37.3 | 0.173 |
| MATE2 rs12943590 v/v   | OCT2 A270S       | T | 7 | 392  | -0.065 | 0.074 | 0.379 | 0.0  | 0.499 |
|                        | MATE1 rs2289669  | A | 7 | 388  | 0.183  | 0.099 | 0.064 | 63.1 | 0.013 |
|                        | MATE1 rs2252281  | C | 5 | 173  | 0.087  | 0.086 | 0.314 | 10.9 | 0.344 |
|                        | OCTN1 T306I      | T | 7 | 371  | -0.045 | 0.050 | 0.366 | 0.0  | 0.465 |
|                        | OCTN1 L503F      | T | 5 | 327  | 0.058  | 0.050 | 0.251 | 18.7 | 0.296 |
| OCTN1 T306I wt/wt      | OCT2 A270S       | T | 7 | 2373 | 0.056  | 0.037 | 0.126 | 1.7  | 0.412 |
|                        | MATE1 rs2289669  | A | 7 | 2260 | -0.006 | 0.028 | 0.819 | 3.4  | 0.400 |
|                        | MATE1 rs2252281  | C | 5 | 1077 | 0.028  | 0.036 | 0.447 | 15.5 | 0.316 |
|                        | MATE2 rs12943590 | A | 7 | 1826 | 0.028  | 0.029 | 0.337 | 0.0  | 0.690 |
| OCTN1 T306I v/v        | OCT2 A270S       | T | 6 | 824  | -0.042 | 0.113 | 0.713 | 48.9 | 0.081 |
|                        | MATE1 rs2289669  | A | 7 | 788  | -0.014 | 0.023 | 0.537 | 34.9 | 0.162 |
|                        | MATE1 rs2252281  | C | 5 | 338  | 0.018  | 0.120 | 0.879 | 66.6 | 0.018 |
|                        | MATE2 rs12943590 | A | 7 | 678  | -0.131 | 0.090 | 0.147 | 65.3 | 0.008 |
| OCTN1 L503F wt/wt      | OCT2 A270S       | T | 5 | 1832 | -0.012 | 0.076 | 0.877 | 57.9 | 0.050 |
|                        | MATE1 rs2289669  | A | 5 | 1710 | -0.024 | 0.028 | 0.378 | 0.0  | 0.732 |
|                        | MATE1 rs2252281  | C | 4 | 770  | -0.044 | 0.053 | 0.412 | 44.8 | 0.143 |
|                        | MATE2 rs12943590 | A | 5 | 1437 | -0.056 | 0.057 | 0.324 | 57.1 | 0.054 |
| OCTN1 L503F v/v        | OCT2 A270S       | T | 5 | 1080 | 0.072  | 0.056 | 0.202 | 47.3 | 0.108 |
|                        | MATE1 rs2289669  | A | 5 | 1012 | -0.012 | 0.040 | 0.763 | 0.0  | 0.991 |
|                        | MATE1 rs2252281  | C | 4 | 432  | 0.030  | 0.058 | 0.603 | 22.4 | 0.276 |
|                        | MATE2 rs12943590 | A | 5 | 767  | 0.037  | 0.045 | 0.419 | 0.0  | 0.759 |

n, number of studies included in the meta-analysis; N, overall number of patients;  $I^2$ , heterogeneity index; p(Q), p-value for Cochrane's Q statistic. A positive beta is a greater glycaemic response to metformin associated with the effect allele.

## References

1. van Leeuwen, N. *et al.* A gene variant near ATM is significantly associated with metformin treatment response in type 2 diabetes: a replication and meta-analysis of five cohorts. *Diabetologia* **55**, 1971-1977 (2012).
2. Zhou, K. *et al.* Common variants near ATM are associated with glycemic response to metformin in type 2 diabetes. *Nat Genet* **43**, 117-120 (2011).
3. Kooy, A. *et al.* Long-term effects of metformin on metabolism and microvascular and macrovascular disease in patients with type 2 diabetes mellitus. *Arch Intern Med* **169**, 616-625 (2009).
4. Tkac, I. *et al.* Pharmacogenomic association between a variant in SLC47A1 gene and therapeutic response to metformin in type 2 diabetes. *Diabetes Obes Metab* **15**, 189-191 (2013).
5. Choi, J.H. *et al.* A common 5'-UTR variant in MATE2-K is associated with poor response to metformin. *Clin Pharmacol Ther* **90**, 674-684 (2011).
6. Stocker, S.L. *et al.* The effect of novel promoter variants in MATE1 and MATE2 on the pharmacokinetics and pharmacodynamics of metformin. *Clin Pharmacol Ther* **93**, 186-194 (2013).
7. Goswami, S. *et al.* Genetic variants in transcription factors are associated with the pharmacokinetics and pharmacodynamics of metformin. *Clin Pharmacol Ther* **96**, 370-379 (2014).
8. Hoffmann, T.J. *et al.* Next generation genome-wide association tool: design and coverage of a high-throughput European-optimized SNP array. *Genomics* **98**, 79-89 (2011).
9. Banda, Y. *et al.* Characterizing Race/Ethnicity and Genetic Ancestry for 100,000 Subjects in the Genetic Epidemiology Research on Adult Health and Aging (GERA) Cohort. *Genetics* **200**, 1285-1295 (2015).
10. Kvale, M.N. *et al.* Genotyping Informatics and Quality Control for 100,000 Subjects in the Genetic Epidemiology Research on Adult Health and Aging (GERA) Cohort. *Genetics* **200**, 1051-1060 (2015).
11. Tarasova, L. *et al.* Association of genetic variation in the organic cation transporters OCT1, OCT2 and multidrug and toxin extrusion 1 transporter protein genes with the gastrointestinal side effects and lower BMI in metformin-treated type 2 diabetes patients. *Pharmacogenet Genomics* **22**, 659-666 (2012).
12. Becker, M.L., Visser, L.E., van Schaik, R.H., Hofman, A., Uitterlinden, A.G. & Stricker, B.H. Genetic variation in the multidrug and toxin extrusion 1 transporter protein influences the glucose-lowering effect of metformin in patients with diabetes: a preliminary study. *Diabetes* **58**, 745-749 (2009).
13. Dujic, T. *et al.* Organic cation transporter 1 variants and gastrointestinal side effects of metformin in patients with Type 2 diabetes. *Diabet Med* **33**, 511-514 (2016).
14. Christensen, M.M. *et al.* The pharmacogenetics of metformin and its impact on plasma metformin steady-state levels and glycosylated hemoglobin A1c. *Pharmacogenet Genomics* **21**, 837-850 (2011).

**Supplementary Figure 1** Regional plots of the association of *SLC22A1/SLC22A2*, *SLC47A1/SLC47A2* and *SLC22A4* loci with metformin glycaemic response assessed as HbA<sub>1c</sub> reduction - meta-analysis results of the two largest MetGen cohorts, the GoDARTS and PMT2-EU study. A total of 3,471 variants with MAF  $\geq$  1% were tested in 6,964 participants. None of the variants reached the significance threshold after correction for multiple testing ( $p > 1.6 \times 10^{-4}$ ).

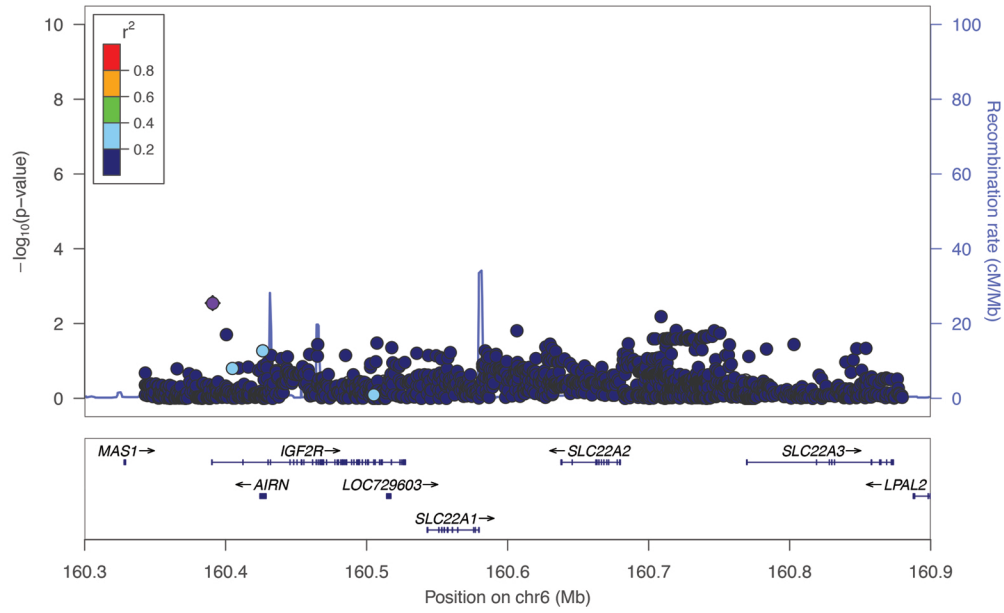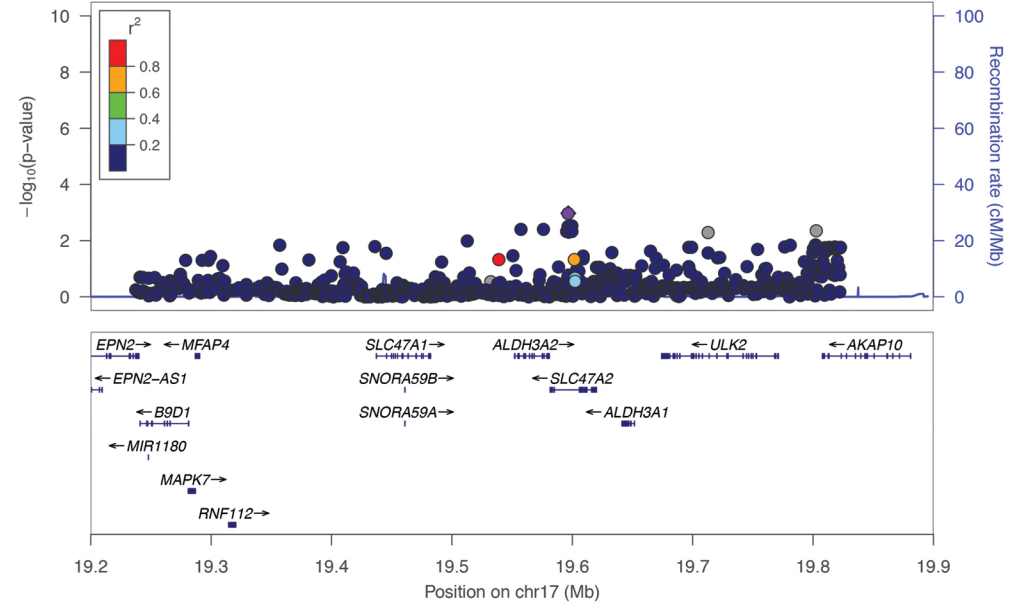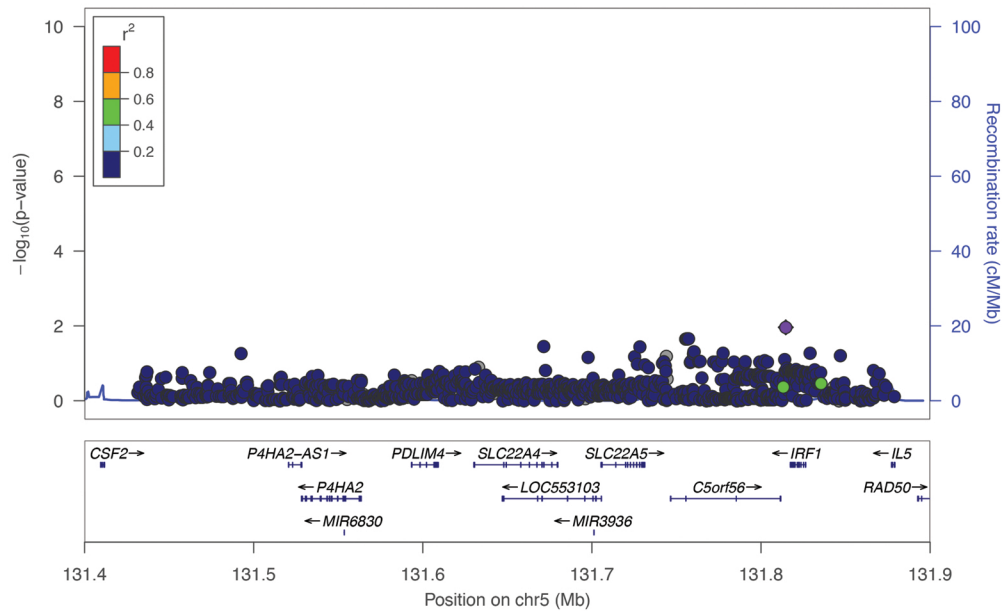

Supplement: CPT-101-763-s001.pdf [file CPT-101-763-s001.pdf]
